# Supplementary material
Source: ML conference proceedings conference paper supplement (https://openaccess.thecvf.com/content/CVPR2024/html/Song_HOIAnimator_Generating_Text-prompt_CVPR_2024_paper.html)
Supplement: Supplementary file 2 [file Song_HOIAnimator_Generating_Text-prompt_CVPR_2024_supplemental.zip]

Archive with 2 entries (2 files):
- 1669_supp/1669_HOIAnimator_Supp.pdf
- 1669_supp/1669_Video.avi
